# Supplementary material for: Beyond the Michaelis‐Menten: Accurate Prediction of In Vivo Hepatic Clearance for Drugs With Low K M
Source: PubMed Central journal article supplement — Clin Transl Sci. 2020 May 26;13(6):1199–207. doi: 10.1111/cts.12804 (PMC7719389; doi:10.1111/cts.12804), 2020-05-26
Supplement: CTS-13-1199-s001.pdf [file CTS-13-1199-s001.pdf]

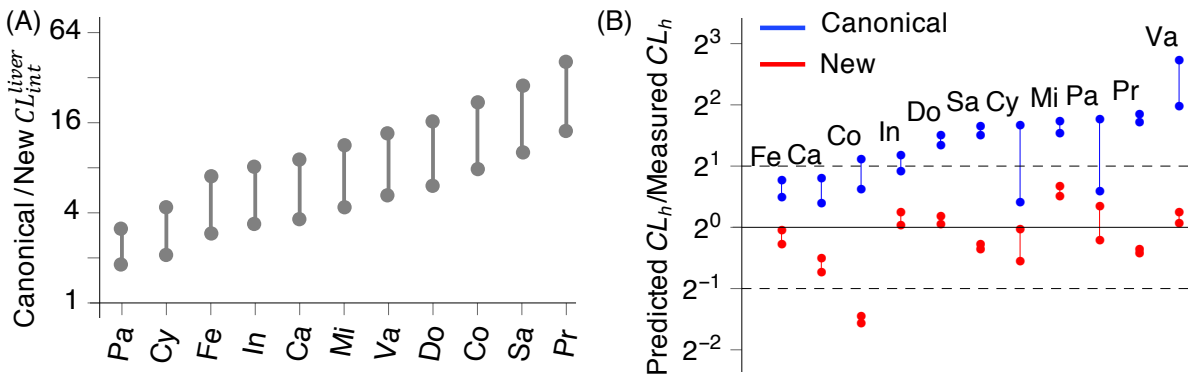

**Figure S1.** Prediction of *in vivo*  $CL$  based on hepatic CYP concentration considering its subcellular localization. (A) While the  $CL_{int}^{liver}$  obtained with the canonical approach depends on the amount of CYPs in liver (i.e.  $\tilde{E}_T$  in Eq. 5), the  $CL_{int}^{liver}$  obtained with the new approach depends on both the amount of CYPs and their concentration in the liver (i.e.  $\tilde{E}_T$  and  $E_T$  in Eq. 7). Thus, the prediction of the new approach changes depending on the volume of CYP distribution ( $V$ ) in the liver, which is a critical factor determining  $E_T$ . In Table 1 and Fig. 2B, we assumed that CYPs are evenly distributed in hepatocytes to estimate the concentration of CYPs in the liver, although CYPs are primarily localized in the membrane of the endoplasmic reticulum<sup>1</sup>. In hepatocytes, the endoplasmic reticulum can comprise less than 20% of the total cell volume<sup>2,3</sup>. Thus, when such subcellular localization of CYP is considered, the estimated concentration of CYP isoforms increases by ~5-fold (100/20) compared to the previously estimated one, which increases the  $K_M + E_T$  in the denominator of Eq. 7 (Table S1). This decreases the estimated  $CL_{int}^{liver}$  with the new approach further and thus increases the difference in  $CL_{int}^{liver}$  predicted with the canonical and new approaches (Table S1). (B) When the higher concentration of CYPs, which was estimated considering their localization in the membrane of the endoplasmic reticulum (Table S1), is used, our new approach improves the accuracy and precision of the prediction for  $CL_h$  by two-fold and four-fold, respectively compared to the canonical approach (Table S2). In particular, 10 out of 11 drugs, except for coumarin, fell within two-fold error. Note that as the experimentally measured  $f_{u-mic}$  of coumarin is not known, it is estimated from the partition coefficient of coumarin ( $\text{Log}P = 1.39$ ) (see Table 2 for details). However, such an approach is known to overestimate  $f_{u-mic}$  when drugs are hydrophilic (i.e.  $\text{Log}P < 2$ )<sup>4</sup>. This indicates that the overestimation of  $f_{u-mic}$  might be the cause of the considerable underestimation for  $CL_h$  of coumarin with the new approach.

## References

1. la Iglesia, F. A. de, Sturgess, J. M., McGuire, E. J. & Feuer, G. Quantitative microscopic evaluation of the endoplasmic reticulum in developing human liver. *Am. J. Pathol.* **82**, 61–70 (1976).
2. Voeltz, G. K., Rolls, M. M. & Rapoport, T. A. Structural organization of the endoplasmic reticulum. *EMBO Rep.* **3**, 944–50 (2002).
3. Alberts, B., Johnson, A., Lewis, J., Raff, M., Roberts, K. and Walter, P. *Molecular biology of the cell. Ann. Bot.* **91**, (2003).
4. Austin, R. P., Barton, P., Cockcroft, S. L., Wenlock, M. C. & Riley, R. J. The influence of nonspecific microsomal binding on apparent intrinsic clearance, and its prediction from physicochemical properties. *Drug Metab. Dispos.* **30**, 1497–503 (2002).
